CORRECTION

## Correction: Extubation outcomes in critically ill post-craniotomy patients: A retrospective cohort study

Jianfang Zhou, Xu-Ying Luo, Guangzhi Shi, Hong-Liang Li, Guang-Qiang Chen

### Notice of Republication

This article [1] was republished on October 21, 2025, to address an issue identified post-publication. An updated version of [S1 File](#) is provided with this notice. Please download this article again to view the correct version.

The article's Data Availability statement is updated to: All relevant data are within the manuscript and its Supporting Information file.

In addition to the concerns above, the corresponding author contacted PLOS about errors in [Fig 1](#), and [Tables 1–2](#);

- In [Fig 1](#), the number of cases for the third extubation attempt is incorrectly duplicated from the second attempt; the correct value is 14, not 177. The correct [Fig 1](#) is provided here.
- In [Tables 1](#) and [2](#), in the fifth column, the number of tracheostomy cases are erroneously recorded as 230, while the correct value is 203. These errors were carried over into the percentage calculations within the same columns, however, the p-values are correct. The correct [Tables 1](#) and [2](#) with updated tracheostomy case percentages are provided here.
- In [Table 2](#), the case numbers for different craniotomy indications (rows 3–6) are misaligned with their corresponding column headings. Please see the correct [Table 2](#) below.

After follow-up with the corresponding author and consultation with a member of the Editorial Board, the *PLOS One* Editors determined that the above errors do not affect the main conclusions of [1].

### Supporting information

**S1 File. Raw data.**  
(XLSX)

### Reference

1. Zhou J, Luo X-Y, Shi G, Li H-L, Chen G-Q. Extubation outcomes in critically ill post-craniotomy patients: A retrospective cohort study. *PLoS One*. 2025;20(10):e0333732. <https://doi.org/10.1371/journal.pone.0333732> PMID: [41042770](https://pubmed.ncbi.nlm.nih.gov/41042770/)

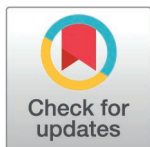

### OPEN ACCESS

**Citation:** Zhou J, Luo X-Y, Shi G, Li H-L, Chen G-Q (2026) Correction: Extubation outcomes in critically ill post-craniotomy patients: A retrospective cohort study. *PLoS One* 21(2): e0343465. <https://doi.org/10.1371/journal.pone.0343465>

**Published:** February 24, 2026

**Copyright:** © 2026 Zhou et al. This is an open access article distributed under the terms of the [Creative Commons Attribution License](https://creativecommons.org/licenses/by/4.0/), which permits unrestricted use, distribution, and reproduction in any medium, provided the original author and source are credited.

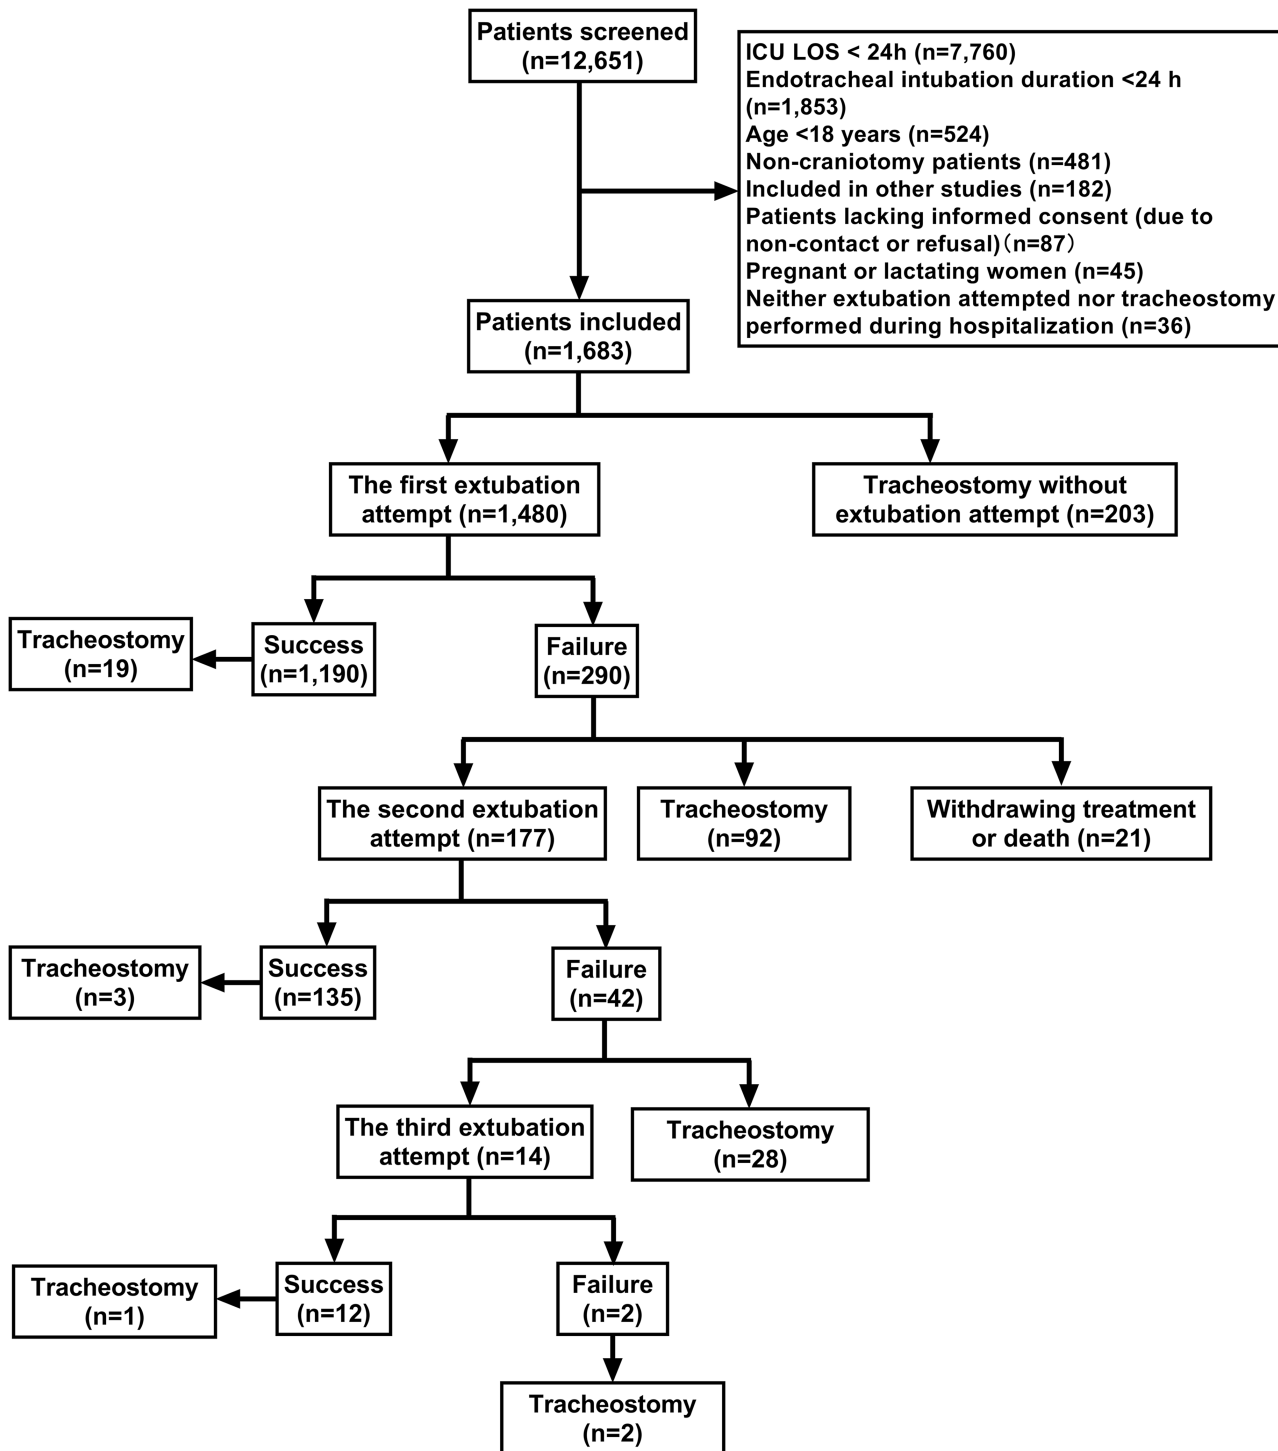

Fig 1. Patient screening and extubation outcomes flowchart. ICU, intensive care unit; LOS, Length of stay.

<https://doi.org/10.1371/journal.pone.0343465.g001>

**Table 1. Demographic and outcome comparisons among direct tracheostomy patients and those with first extubation success or failure.**

| Variables                            | Total<br>(n = 1683) | Success<br>(n = 1190) | Failed<br>(n = 290) | Tracheostomy<br>(n = 203) | p value |
|--------------------------------------|---------------------|-----------------------|---------------------|---------------------------|---------|
| Age (year) <sup>†</sup>              | 50(38, 59)          | 48(36, 57)            | 54(44, 63)          | 53(40, 60)                | <0.001  |
| Male <sup>‡</sup>                    | 884(52.5%)          | 583(49.0%)            | 183(63.1%)          | 118(58.1%)                | <0.001  |
| Smoking <sup>‡</sup>                 | 256(15.2%)          | 162(13.6%)            | 58(20.0%)           | 36(17.7%)                 | 0.014   |
| Alcoholism <sup>‡</sup>              | 129(7.7%)           | 80(6.7%)              | 31(10.7%)           | 18(8.9%)                  | 0.059   |
| Comorbidities                        |                     |                       |                     |                           |         |
| Hypertension <sup>‡</sup>            | 419(24.9%)          | 241(20.3%)            | 117(40.3%)          | 61(30.0%)                 | <0.001  |
| Diabetes <sup>‡</sup>                | 155(9.2%)           | 93(7.8%)              | 32(11.0%)           | 30(14.8%)                 | 0.003   |
| Tumor <sup>‡</sup>                   | 79(4.7%)            | 50(4.2%)              | 22(7.6%)            | 7(3.4%)                   | 0.034   |
| Cerebrovascular disease <sup>‡</sup> | 87(5.2%)            | 57(4.8%)              | 17(5.9%)            | 13(6.4%)                  | 0.531   |
| Coronary heart disease <sup>‡</sup>  | 50(3.0%)            | 30(2.5%)              | 12(4.1%)            | 8(3.9%)                   | 0.238   |
| Chronic lung disease <sup>‡</sup>    | 9(0.5%)             | 6(0.5%)               | 2(0.7%)             | 1(0.5%)                   | 0.929   |
| Pneumonia <sup>‡</sup>               | 540(32.1%)          | 214(18.0%)            | 190(65.5%)          | 136(67.0%)                | <0.001  |
| CNS infection <sup>‡</sup>           | 387(23.0%)          | 257(21.6%)            | 78(26.9%)           | 52(25.6%)                 | 0.101   |
| Surgical site infection <sup>‡</sup> | 39(2.3%)            | 19(1.6%)              | 10(3.4%)            | 10(4.9%)                  | 0.005   |
| Sepsis <sup>‡</sup>                  | 391(23.2%)          | 151(12.7%)            | 142(49.0%)          | 98(48.3%)                 | <0.001  |
| AKI <sup>‡</sup>                     | 187(11.1%)          | 96(8.1%)              | 47(16.2%)           | 44(21.7%)                 | <0.001  |
| Shock <sup>‡</sup>                   | 59(3.5%)            | 16(1.3%)              | 19(6.6%)            | 24(11.8%)                 | <0.001  |
| APACHE II <sup>†</sup>               | 15(12, 19)          | 14(11, 17)            | 17(14, 20)          | 19(15, 23)                | <0.001  |
| SOFA <sup>†</sup>                    | 3(2, 5)             | 2(2, 4)               | 4(3, 5)             | 5(4, 6)                   | <0.001  |
| GCS (ICU day 1) <sup>†</sup>         | 10(8, 10)           | 10(9, 10)             | 10(7, 10)           | 7(5, 10)                  | <0.001  |
| ICU readmission <sup>‡</sup>         | 168(10.0%)          | 70(5.9%)              | 75(25.9%)           | 23(11.3%)                 | <0.001  |
| ICU LOS (day) <sup>†</sup>           | 6(3, 13)            | 4(2, 7)               | 15(9, 24)           | 16(10, 26)                | <0.001  |
| Hospital LOS (day) <sup>†</sup>      | 21(15, 31)          | 19(14, 26)            | 30(23, 41)          | 29(22, 42)                | <0.001  |
| GOS <sup>†</sup>                     | 4(3, 5)             | 5(4, 5)               | 4(3, 4)             | 3(3, 3)                   | <0.001  |
| Death <sup>‡</sup>                   | 111(6.6%)           | 71(6.0%)              | 21(7.2%)            | 19(9.4%)                  | 0.176   |

<sup>†</sup> Data were expressed as median (IQR). <sup>‡</sup> Data were expressed as frequency (%). CNS, central nervous system; AKI, acute Kidney Injury; APACHE, acute physiology and chronic health evaluation; SOFA, sequential organ failure assessment; GCS, Glasgow coma scale; ICU, intensive care unit; LOS, length of stay; GOS, Glasgow outcome scale.

<https://doi.org/10.1371/journal.pone.0343465.t001>

**Table 2. Comparison of perioperative characteristics among patients undergoing direct tracheostomy versus those with successful or failed first extubation.**

| Variables                                | Total<br>(n = 1683) | Success<br>(n = 1190) | Failed<br>(n = 290) | Tracheostomy<br>(n = 203) | p value |
|------------------------------------------|---------------------|-----------------------|---------------------|---------------------------|---------|
| Indications for craniotomy               |                     |                       |                     |                           |         |
| Tumor <sup>†</sup>                       | 1149(68.3%)         | 823(69.2%)            | 204(70.3%)          | 122(60.1%)                | 0.026   |
| Cerebrovascular disease <sup>†</sup>     | 312(18.5%)          | 222(18.7%)            | 48(16.6%)           | 42(20.7%)                 | 0.499   |
| Trauma <sup>†</sup>                      | 151(9.0%)           | 88(7.4%)              | 28(9.7%)            | 35(17.2%)                 | <0.001  |
| Other <sup>†</sup>                       | 71(4.2%)            | 57(4.8%)              | 10(3.4%)            | 4(2.0%)                   | 0.140   |
| Surgical site                            |                     |                       |                     |                           | 0.014   |
| Supratentorial <sup>†</sup>              | 798(47.4%)          | 543(45.6%)            | 140(48.3%)          | 115(56.7%)                |         |
| Infratentorial <sup>†</sup>              | 885(52.6%)          | 647(54.4%)            | 150(51.7%)          | 88(43.3%)                 |         |
| Duration of operation(hour) <sup>†</sup> | 4.9(3.4, 6.5)       | 5.0(3.5, 6.7)         | 4.6(3.4, 6.5)       | 4.3(3.0, 6.2)             | 0.591   |
| Admission category                       |                     |                       |                     |                           | <0.001  |
| Elective surgery <sup>†</sup>            | 1413(84.0%)         | 1016(85.4%)           | 249(85.9%)          | 148(72.9%)                |         |
| Emergency surgery <sup>†</sup>           | 270(16.0%)          | 174(14.6%)            | 41(14.1%)           | 55(27.1%)                 |         |

<sup>†</sup> Data were expressed as median (IQR). <sup>‡</sup> Data were expressed as frequency (%).

<https://doi.org/10.1371/journal.pone.0343465.t002>
